# Supplementary material for: Age-based (<65 vs ≥65 years) incidence of infections and serious infections with tofacitinib versus biological DMARDs in rheumatoid arthritis clinical trials and the US Corrona RA registry
Source: PubMed Central journal article supplement — Ann Rheum Dis. 2020 Oct 12;80(1):134–6. doi: 10.1136/annrheumdis-2020-218992 (PMC7788057; doi:10.1136/annrheumdis-2020-218992), 2020-10-12
Supplement: annrheumdis-2020-218992supp001.pdf [file annrheumdis-2020-218992supp001.pdf]

**Supplementary figure S1** a) IRs (95% CI) and b) HRs<sup>a</sup> (95% CI) between treatment groups, overall and stratified by age (<65 years or ≥65 years), and c) HRs<sup>b</sup> (95% CI) between age groups for each treatment group, for all infection events (non-serious and serious) in pooled Phase 2, 3 and 3b/4 studies (Months 0–12).<sup>c</sup>

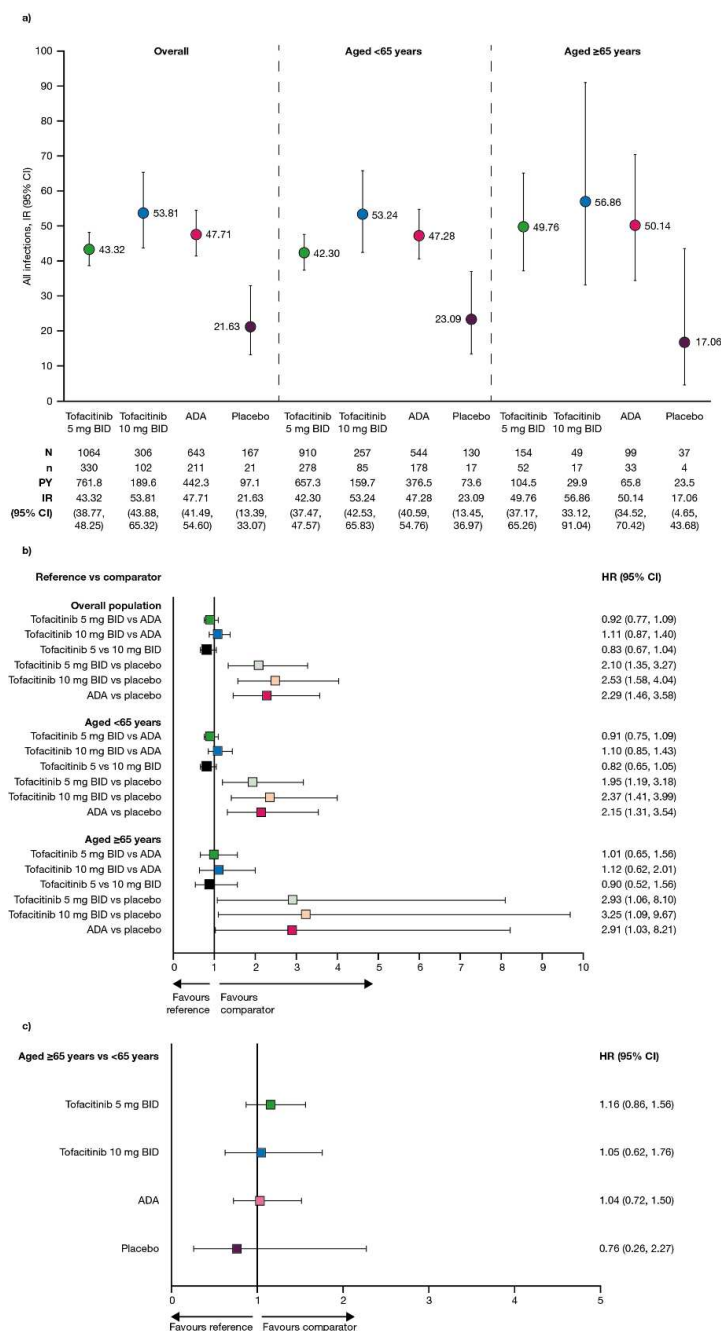

Pooled data from Phase 2 (A3921035; NCT00550446), Phase 3 (ORAL Standard; NCT00853385) and Phase 3b/4 (ORAL Strategy; NCT02187055) studies

IR=unique patients with events/100 PY

<sup>a</sup>Cox proportional hazards model includes treatment as the only factor

<sup>b</sup>Cox proportional hazards model includes treatment, age group (<65 years or ≥65 years) and treatment by age group interaction terms

<sup>c</sup>For Study A3921035, only data within the first 3-month randomised parallel treatment period were included (before patients who were receiving ADA were switched to tofacitinib 5 mg BID after Month 3)

ADA, adalimumab; BID, twice daily; CI, confidence interval; HR, hazard ratio; IR, incidence rate; N, number of treated patients; n, number of patients with event; PY, patient-years

**Supplementary figure S2** IRs (95% CI) of SIEs in the US Corrona RA registry, stratified by age (<65 years or  $\geq$ 65 years).

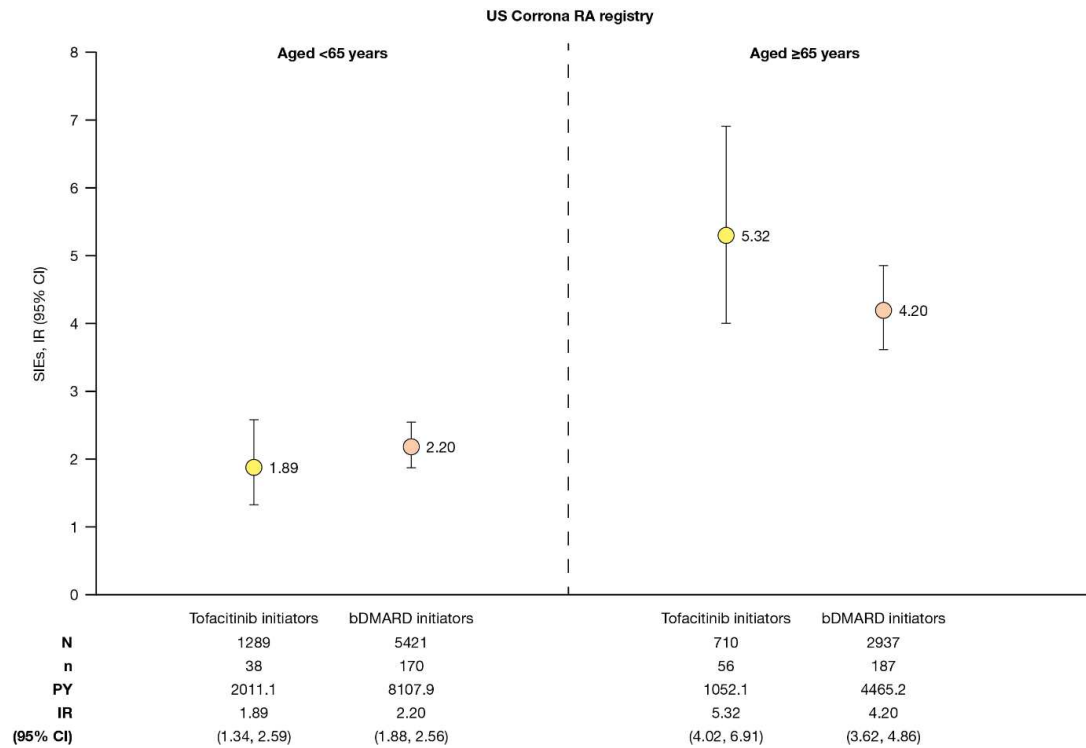

Data from the US Corrona RA registry for patients initiating tofacitinib or bDMARDs between 6 November 2012 and 31 January 2019

Age-/gender-adjusted IR=first events/100 PY

bDMARD, biologic disease-modifying antirheumatic drug; CI, confidence interval; IR, incidence rate;

N, number of patients in each treatment group; n, number of patients with event; PY, patient-years;

RA, rheumatoid arthritis; SIE, serious infection event
